# Supplementary material for: JAX Animal Behavior System (JABS), a genetics-informed, end-to-end advanced behavioral phenotyping platform for the laboratory mouse
Source: eLife. 2026 Mar 2;14:RP107259. doi: 10.7554/eLife.107259 (PMC12952791; doi:10.7554/eLife.107259)
Supplement: Supplementary file 1. — Table 1: Data used for grooming benchmark. Number of videos (first column), and number of annotated frames (second and third columns). Table 2: Classifiers trained by JABS with their respective window sizes and F1 scores. [file elife-107259-supp1.xlsx]

## Sheet: Table1
Video Count	Behavior	Not Behavior
10	11778	18201
20	19540	28777
50	43022	51466
100	76109	104889
500	399155	595798
1100 (All)	863394	1318396

## Sheet: Table2
Classifier	Window Size	Accuracy	F1 score	Precision	Recall
Escape	2	0.96	0.87	0.86	0.93
Grooming	60	0.94	0.92	0.92	0.93
Rearing supported	5	0.95	0.93	0.95	0.92
Rearing unsupported	10	0.87	0.78	0.88	0.77
Turn Left (Annotator-1)	5	0.91	0.78	0.84	0.76
Turn Left (Annotator-2)	5	0.91	0.89	0.87	0.93
Turn Right (Annotator-1)	20	0.92	0.85	0.85	0.88
Turn Right (Annotator-2)	5	0.9	0.87	0.85	0.9
