# Supplementary material for: JAX Animal Behavior System (JABS), a genetics-informed, end-to-end advanced behavioral phenotyping platform for the laboratory mouse
Source: eLife. 2026 Mar 2;14:RP107259. doi: 10.7554/eLife.107259 (PMC12952791; doi:10.7554/eLife.107259)
Supplement: Supplementary file 2. — Table 3: Summary of framewise behavioral phenotypes and their definitions. Each value corresponds to the total duration (in s) of the indicated behavior during the specified time window, averaged across all analyzed videos. Table 4: Behavioral phenotypes annotated by different annotators (A1, A2). Each phenotypemeasures a specific metric related to bouts of the indicated behavior during the first 55 min of the video averaged across all the analyzed videos. [file elife-107259-supp2.xlsx]

## Sheet: Table3
Phenotype	Description
turn_left_T5	Total duration of left turn behavior during the first 5 minutes of video.
turn_left_T20	Total duration of left turn behavior during the first 20 minutes of video.
turn_left_T55	Total duration of left turn behavior during the first 55 minutes of video.
turn_right_T5	Total duration of right turn behavior during the first 5 minutes of video.
turn_right_T20	Total duration of right turn behavior during the first 20 minutes of video.
turn_right_T55	Total duration of right turn behavior during the first 55 minutes of video.
grooming_T5	Total duration of grooming behavior during the first 5 minutes.
grooming_T20	Total duration of grooming behavior during the first 20 minutes.
grooming_T55	Total duration of grooming behavior during the first 55 minutes.
rearing_supported_T5	Total duration of supported rearing during the first 5 minutes.
rearing_supported_T20	Total duration of supported rearing during the first 20 minutes.
rearing_supported_T55	Total duration of supported rearing during the first 55 minutes.
rearing_unsupported_T5	Total duration of unsupported rearing during the first 5 minutes.
rearing_unsupported_T20	Total duration of unsupported rearing during the first 20 minutes.
rearing_unsupported_T55	Total duration of unsupported rearing during the first 55 minutes.

## Sheet: Table4
Phenotype	Description
A2_TL_T55_avgLen	Average bout length predicted by left turn behavior classifier (trained on labels by annotator 2) during first 55 minutes.
A2_TL_T55_nBouts	Number of left turn bouts predicted by left turn behavior classifier (trained on labels by annotator 2) during first 55 minutes.
A2_TL_T55_duration	Total duration predicted by left turn behavior classifier (trained on labels by annotator 2) during first 55 minutes.
A1_TR_T55_avgLen	Average bout length predicted by right turn behavior classifier (trained on labels by annotator 1) during first 55 minutes.
A1_TR_T55_nBouts	Number of right turn bouts predicted by left turn behavior classifier (trained on labels by annotator 1) during first 55 minutes.
A1_TR_T55_duration	Total duration predicted by right turn behavior classifier (trained on labels by annotator 1) during first 55 minutes.
A1_TL_T55_avgLen	Average bout length predicted by left turn behavior classifier (trained on labels by annotator 1) during first 55 minutes.
A1_TL_T55_nBouts	Number of left turn bouts predicted by left turn behavior classifier (trained on labels by annotator 1) during first 55 minutes.
A1_TL_T55_duration	Total duration predicted by left turn behavior classifier (trained on labels by annotator 1) during first 55 minutes.
SR_T55_avgLen	Average bout length predicted by scratch behavior classifier during first 55 minutes.
SR_T55_nBouts	Number of bouts predicted by scratch behavior classifier during first 55 minutes.
SR_T55_duration	Total duration predicted by scratch behavior classifier during first 55 minutes.
RUS_T55_avgLen	Average bout length predicted by rearing unsupported behavior classifier during first 55 minutes.
RUS_T55_nBouts	Number of bouts predicted by rearing unsupported behavior classifier during first 55 minutes.
RUS_T55_duration	Total duration predicted by rearing unsupported behavior classifier during first 55 minutes.
RS_T55_avgLen	Average bout length predicted by rearing supported behavior classifier during first 55 minutes.
RS_T55_nBouts	Number of bouts predicted by rearing supported behavior classifier during first 55 minutes.
RS_T55_duration	Total duration predicted by rearing supported behavior classifier during first 55 minutes.
GR_T55_avgLen	Average bout length predicted by grooming behavior classifier during first 55 minutes.
GR_T55_nBouts	Number of bouts predicted by grooming behavior classifier during first 55 minutes.
GR_T55_duration	Total duration predicted by grooming behavior classifier during first 55 minutes.
