# Supplementary material for: JAX Animal Behavior System (JABS), a genetics-informed, end-to-end advanced behavioral phenotyping platform for the laboratory mouse
Source: eLife. 2026 Mar 2;14:RP107259. doi: 10.7554/eLife.107259 (PMC12952791; doi:10.7554/eLife.107259)
Supplement: Supplementary file 3. — Table 5: List of JABS per-frame features. [file elife-107259-supp3.xlsx]

## Sheet: Table5
feature
ANGLE NOSE-BASE_NECK-RIGHT_FRONT_PAW
ANGLE NOSE-BASE_NECK-LEFT_FRONT_PAW
ANGLE RIGHT_FRONT_PAW-BASE_NECK-CENTER_SPINE
ANGLE LEFT_FRONT_PAW-BASE_NECK-CENTER_SPINE
ANGLE BASE_NECK-CENTER_SPINE-BASE_TAIL
ANGLE RIGHT_REAR_PAW-BASE_TAIL-CENTER_SPINE
ANGLE LEFT_REAR_PAW-BASE_TAIL-CENTER_SPINE
ANGLE RIGHT_REAR_PAW-BASE_TAIL-MID_TAIL
ANGLE LEFT_REAR_PAW-BASE_TAIL-MID_TAIL
ANGLE CENTER_SPINE-BASE_TAIL-MID_TAIL
ANGLE BASE_TAIL-MID_TAIL-TIP_TAIL
ANGULAR_VELOCITY
BASE TAIL VELOCITY DIRECTION
BASE TAIL VELOCITY MAGNITUDE
CENTROID_VELOCITY_DIR
CENTROID_VELOCITY_MAG
LEFT FRONT PAW VELOCITY DIRECTION
LEFT FRONT PAW VELOCITY MAGNITUDE
NOSE VELOCITY DIRECTION
NOSE VELOCITY MAGNITUDE
NOSE-LEFT_EAR
NOSE-RIGHT_EAR
NOSE-BASE_NECK
NOSE-LEFT_FRONT_PAW
NOSE-RIGHT_FRONT_PAW
NOSE-CENTER_SPINE
NOSE-LEFT_REAR_PAW
NOSE-RIGHT_REAR_PAW
NOSE-BASE_TAIL
NOSE-MID_TAIL
NOSE-TIP_TAIL
LEFT_EAR-RIGHT_EAR
LEFT_EAR-BASE_NECK
LEFT_EAR-LEFT_FRONT_PAW
LEFT_EAR-RIGHT_FRONT_PAW
LEFT_EAR-CENTER_SPINE
LEFT_EAR-LEFT_REAR_PAW
LEFT_EAR-RIGHT_REAR_PAW
LEFT_EAR-BASE_TAIL
LEFT_EAR-MID_TAIL
LEFT_EAR-TIP_TAIL
RIGHT_EAR-BASE_NECK
RIGHT_EAR-LEFT_FRONT_PAW
RIGHT_EAR-RIGHT_FRONT_PAW
RIGHT_EAR-CENTER_SPINE
RIGHT_EAR-LEFT_REAR_PAW
RIGHT_EAR-RIGHT_REAR_PAW
RIGHT_EAR-BASE_TAIL
RIGHT_EAR-MID_TAIL
RIGHT_EAR-TIP_TAIL
BASE_NECK-LEFT_FRONT_PAW
BASE_NECK-RIGHT_FRONT_PAW
BASE_NECK-CENTER_SPINE
BASE_NECK-LEFT_REAR_PAW
BASE_NECK-RIGHT_REAR_PAW
BASE_NECK-BASE_TAIL
BASE_NECK-MID_TAIL
BASE_NECK-TIP_TAIL
LEFT_FRONT_PAW-RIGHT_FRONT_PAW
LEFT_FRONT_PAW-CENTER_SPINE
LEFT_FRONT_PAW-LEFT_REAR_PAW
LEFT_FRONT_PAW-RIGHT_REAR_PAW
LEFT_FRONT_PAW-BASE_TAIL
LEFT_FRONT_PAW-MID_TAIL
LEFT_FRONT_PAW-TIP_TAIL
RIGHT_FRONT_PAW-CENTER_SPINE
RIGHT_FRONT_PAW-LEFT_REAR_PAW
RIGHT_FRONT_PAW-RIGHT_REAR_PAW
RIGHT_FRONT_PAW-BASE_TAIL
RIGHT_FRONT_PAW-MID_TAIL
RIGHT_FRONT_PAW-TIP_TAIL
CENTER_SPINE-LEFT_REAR_PAW
CENTER_SPINE-RIGHT_REAR_PAW
CENTER_SPINE-BASE_TAIL
CENTER_SPINE-MID_TAIL
CENTER_SPINE-TIP_TAIL
LEFT_REAR_PAW-RIGHT_REAR_PAW
LEFT_REAR_PAW-BASE_TAIL
LEFT_REAR_PAW-MID_TAIL
LEFT_REAR_PAW-TIP_TAIL
RIGHT_REAR_PAW-BASE_TAIL
RIGHT_REAR_PAW-MID_TAIL
RIGHT_REAR_PAW-TIP_TAIL
BASE_TAIL-MID_TAIL
BASE_TAIL-TIP_TAIL
MID_TAIL-TIP_TAIL
NOSE POINT MASK
LEFT_EAR POINT MASK
RIGHT_EAR POINT MASK
BASE_NECK POINT MASK
LEFT_FRONT_PAW POINT MASK
RIGHT_FRONT_PAW POINT MASK
CENTER_SPINE POINT MASK
LEFT_REAR_PAW POINT MASK
RIGHT_REAR_PAW POINT MASK
BASE_TAIL POINT MASK
MID_TAIL POINT MASK
TIP_TAIL POINT MASK
NOSE SPEED
LEFT_EAR SPEED
RIGHT_EAR SPEED
BASE_NECK SPEED
LEFT_FRONT_PAW SPEED
RIGHT_FRONT_PAW SPEED
CENTER_SPINE SPEED
LEFT_REAR_PAW SPEED
RIGHT_REAR_PAW SPEED
BASE_TAIL SPEED
MID_TAIL SPEED
TIP_TAIL SPEED
RIGHT FRONT PAW VELOCITY DIRECTION
RIGHT FRONT PAW VELOCITY MAGNITUDE
