# Supplementary material for: JAX Animal Behavior System (JABS), a genetics-informed, end-to-end advanced behavioral phenotyping platform for the laboratory mouse
Source: eLife. 2026 Mar 2;14:RP107259. doi: 10.7554/eLife.107259 (PMC12952791; doi:10.7554/eLife.107259)
Supplement: Supplementary file 4. — Table 6: Mouse strains used in this study and their JAX stock numbers. [file elife-107259-supp4.xlsx]

## Sheet: SupplementaryFile6
REAGENT or RESOURCE	SOURCE	IDENTIFIER	JAX_URL
Mouse: BALB/cJ	The Jackson Laboratory	JAX: 000651	https://www.jax.org/strain/000651
Mouse: C57BL/6J	The Jackson Laboratory	JAX: 000664	https://www.jax.org/strain/000664
Mouse: BTBR T<+> Itpr3<tf>/J	The Jackson Laboratory	JAX: 002282	https://www.jax.org/strain/002282
Mouse: A/J	The Jackson Laboratory	JAX: 000646	https://www.jax.org/strain/000646
Mouse: C57BLKS/J	The Jackson Laboratory	JAX: 000662	https://www.jax.org/strain/000662
Mouse: C3H/HeJ	The Jackson Laboratory	JAX: 000659	https://www.jax.org/strain/000659
Mouse: C3HeB/FeJ	The Jackson Laboratory	JAX: 000658	https://www.jax.org/strain/000658
Mouse: C57L/J	The Jackson Laboratory	JAX: 000668	https://www.jax.org/strain/000668
Mouse: CAST/EiJ	The Jackson Laboratory	JAX: 000928	https://www.jax.org/strain/000928
Mouse: LP/J	The Jackson Laboratory	JAX: 000676	https://www.jax.org/strain/000676
Mouse: NZB/BlNJ	The Jackson Laboratory	JAX: 000684	https://www.jax.org/strain/000684
Mouse: C3H/HeOuJ	The Jackson Laboratory	JAX: 000635	https://www.jax.org/strain/000635
Mouse: NOR/LtJ	The Jackson Laboratory	JAX: 002050	https://www.jax.org/strain/002050
Mouse: BALB/cByJ	The Jackson Laboratory	JAX: 001026	https://www.jax.org/strain/001026
Mouse: B6AF1/J	The Jackson Laboratory	JAX: 100002	https://www.jax.org/strain/100002
Mouse: B6C3F1/J	The Jackson Laboratory	JAX: 100010	https://www.jax.org/strain/100010
Mouse: CB6F1/J	The Jackson Laboratory	JAX: 100007	https://www.jax.org/strain/100007
Mouse: 129P3/J	The Jackson Laboratory	JAX: 000690	https://www.jax.org/strain/000690
Mouse: NON/ShiLtJ	The Jackson Laboratory	JAX: 002423	https://www.jax.org/strain/002423
Mouse: AKR/J	The Jackson Laboratory	JAX: 000648	https://www.jax.org/strain/000648
Mouse: CAF1/J	The Jackson Laboratory	JAX: 100003	https://www.jax.org/strain/100003
Mouse: TALLYHO/JngJ	The Jackson Laboratory	JAX: 005314	https://www.jax.org/strain/005314
Mouse: B6D2F1/J	The Jackson Laboratory	JAX: 100006	https://www.jax.org/strain/100006
Mouse: 129X1/SvJ	The Jackson Laboratory	JAX: 000691	https://www.jax.org/strain/000691
Mouse: FVB/NJ	The Jackson Laboratory	JAX: 001800	https://www.jax.org/strain/001800
Mouse: SWR/J	The Jackson Laboratory	JAX: 000689	https://www.jax.org/strain/000689
Mouse: B6SJLF1/J	The Jackson Laboratory	JAX: 100012	https://www.jax.org/strain/100012
Mouse: B6129PF1/J	The Jackson Laboratory	JAX: 100492	https://www.jax.org/strain/100492
Mouse: CBA/J	The Jackson Laboratory	JAX: 000656	https://www.jax.org/strain/000656
Mouse: 129S1/SvImJ	The Jackson Laboratory	JAX: 002448	https://www.jax.org/strain/002448
Mouse: B6129SF1/J	The Jackson Laboratory	JAX: 101043	https://www.jax.org/strain/101043
Mouse: DBA/1J	The Jackson Laboratory	JAX: 000670	https://www.jax.org/strain/000670
Mouse: C57BL/6NJ	The Jackson Laboratory	JAX: 005304	https://www.jax.org/strain/005304
Mouse: CBA/CaJ	The Jackson Laboratory	JAX: 000654	https://www.jax.org/strain/000654
Mouse: NZBWF1/J	The Jackson Laboratory	JAX: 100008	https://www.jax.org/strain/100008
Mouse: MSM/MsJ	The Jackson Laboratory	JAX: 003719	https://www.jax.org/strain/003719
Mouse: PWD/PhJ	The Jackson Laboratory	JAX: 004660	https://www.jax.org/strain/004660
Mouse: NZO/HlLtJ	The Jackson Laboratory	JAX: 002105	https://www.jax.org/strain/002105
Mouse: CZECHII/EiJ	The Jackson Laboratory	JAX: 001144	https://www.jax.org/strain/001144
Mouse: MA/MyJ	The Jackson Laboratory	JAX: 000677	https://www.jax.org/strain/000677
Mouse: RIIIS/J	The Jackson Laboratory	JAX: 000683	https://www.jax.org/strain/000683
Mouse: PWK/PhJ	The Jackson Laboratory	JAX: 003715	https://www.jax.org/strain/003715
Mouse: C58/J	The Jackson Laboratory	JAX: 000669	https://www.jax.org/strain/000669
Mouse: SJL/J	The Jackson Laboratory	JAX: 000686	https://www.jax.org/strain/000686
Mouse: NU/J	The Jackson Laboratory	JAX: 002019	https://www.jax.org/strain/002019
Mouse: NOD/ShiLtJ	The Jackson Laboratory	JAX: 001976	https://www.jax.org/strain/001976
Mouse: B6CBAF1/J	The Jackson Laboratory	JAX: 100011	https://www.jax.org/strain/100011
Mouse: BUB/BnJ	The Jackson Laboratory	JAX: 000653	https://www.jax.org/strain/000653
Mouse: MOLF/EiJ	The Jackson Laboratory	JAX: 000550	https://www.jax.org/strain/000550
Mouse: I/LnJ	The Jackson Laboratory	JAX: 000674	https://www.jax.org/strain/000674
Mouse: C57BR/cdJ	The Jackson Laboratory	JAX: 000667	https://www.jax.org/strain/000667
Mouse: DBA/2J	The Jackson Laboratory	JAX: 000671	https://www.jax.org/strain/000671
Mouse: C57BL/10SnJ	The Jackson Laboratory	JAX: 000666	https://www.jax.org/strain/000666
Mouse: NZW/LacJ	The Jackson Laboratory	JAX: 001058	https://www.jax.org/strain/001058
Mouse: PL/J	The Jackson Laboratory	JAX: 000680	https://www.jax.org/strain/000680
Mouse: CByB6F1/J	The Jackson Laboratory	JAX: 100009	https://www.jax.org/strain/100009
Mouse: MRL/MpJ	The Jackson Laboratory	JAX: 000486	https://www.jax.org/strain/000486
Mouse: SM/J	The Jackson Laboratory	JAX: 000687	https://www.jax.org/strain/000687
Mouse: LG/J	The Jackson Laboratory	JAX: 000675	https://www.jax.org/strain/000675
Mouse: SEA/GnJ	The Jackson Laboratory	JAX: 000644	https://www.jax.org/strain/000644
Mouse: KK/HlJ	The Jackson Laboratory	JAX: 002106	https://www.jax.org/strain/002106
Mouse: WSB/EiJ	The Jackson Laboratory	JAX: 001145	https://www.jax.org/strain/001145
Mouse: BXD83/RwwJ	The Jackson Laboratory	JAX: 007126	https://www.jax.org/strain/007126
Mouse: BXD78/2RwwJ	The Jackson Laboratory	JAX: 024029	https://www.jax.org/strain/024029
Mouse: BXD194/RwwJ	The Jackson Laboratory	JAX: 030878	https://www.jax.org/strain/030878
Mouse: BXD214/RwwJ	The Jackson Laboratory	JAX: 030882	https://www.jax.org/strain/030882
Mouse: BXD44/RwwJ	The Jackson Laboratory	JAX: 007094	https://www.jax.org/strain/007094
Mouse: BXD31/TyJ	The Jackson Laboratory	JAX:000083	https://www.jax.org/strain/000083
Mouse: BXD19/TyJ	The Jackson Laboratory	JAX: 000010	https://www.jax.org/strain/000010
Mouse: BXD125/RwwJ	The Jackson Laboratory	JAX: 024031	https://www.jax.org/strain/024031
Mouse: BXD67/RwwJ	The Jackson Laboratory	JAX: 007112	https://www.jax.org/strain/007112
Mouse: BXD170/RwwJ	The Jackson Laboratory	JAX: 029878	https://www.jax.org/strain/029878
Mouse: BXD95/RwwJ	The Jackson Laboratory	JAX: 007138	https://www.jax.org/strain/007138
Mouse: BXD32/TyJ	The Jackson Laboratory	JAX: 000078	https://www.jax.org/strain/000078
Mouse: BXD49/RwwJ	The Jackson Laboratory	JAX: 007098	https://www.jax.org/strain/007098
Mouse: BXD75/RwwJ	The Jackson Laboratory	JAX: 007119	https://www.jax.org/strain/007119
Mouse: BXD48a/RwwJ	The Jackson Laboratory	JAX: 007139	https://www.jax.org/strain/007139
Mouse: BXD160/RwwJ	The Jackson Laboratory	JAX: 029873	https://www.jax.org/strain/029873
Mouse: BXD157/RwwJ	The Jackson Laboratory	JAX: 029872	https://www.jax.org/strain/029872
Mouse: BXD73a/RwwJ	The Jackson Laboratory	JAX: 007124	https://www.jax.org/strain/007124
Mouse: BXD190/RwwJ	The Jackson Laboratory	JAX: 030876	https://www.jax.org/strain/030876
Mouse: BXD11/TyJ	The Jackson Laboratory	JAX: 000012	https://www.jax.org/strain/000012
Mouse: BXD28/TyJ	The Jackson Laboratory	JAX: 000047	https://www.jax.org/strain/000047
Mouse: BXD12/TyJ	The Jackson Laboratory	JAX: 000045	https://www.jax.org/strain/000045
Mouse: BXD29-Tlr4<lps-2J>/J	The Jackson Laboratory	JAX: 000029	https://www.jax.org/strain/000029
Mouse: BXD68/RwwJ	The Jackson Laboratory	JAX: 007113	https://www.jax.org/strain/007113
Mouse: BXD191/RwwJ	The Jackson Laboratory	JAX: 030877	https://www.jax.org/strain/030877
Mouse: BXD77/RwwJ	The Jackson Laboratory	JAX: 007121	https://www.jax.org/strain/007121
Mouse: BXD99/RwwJ	The Jackson Laboratory	JAX: 007142	https://www.jax.org/strain/007142
Mouse: BXD43/RwwJ	The Jackson Laboratory	JAX: 007093	https://www.jax.org/strain/007093
Mouse: BXD24/TyJ-Cep290<RD16>/J	The Jackson Laboratory	JAX: 000031	https://www.jax.org/strain/000031
Mouse: BXD42/TyJ	The Jackson Laboratory	JAX: 003230	https://www.jax.org/strain/003230
Mouse: BXD69/RwwJ	The Jackson Laboratory	JAX: 007114	https://www.jax.org/strain/007114
Mouse: BXD168/RwwJ	The Jackson Laboratory	JAX: 029874	https://www.jax.org/strain/029874
Mouse: BXD15/TyJ	The Jackson Laboratory	JAX: 000015	https://www.jax.org/strain/000015
Mouse: BXD51/RwwJ	The Jackson Laboratory	JAX: 007100	https://www.jax.org/strain/007100
Mouse: BXD90/RwwJ	The Jackson Laboratory	JAX: 007133	https://www.jax.org/strain/007133
Mouse: BXD61/RwwJ	The Jackson Laboratory	JAX: 007106	https://www.jax.org/strain/007106
Mouse: BXD64/BwwJ	The Jackson Laboratory	JAX:007109	https://www.jax.org/strain/007109
Mouse: BXD5/TyJ	The Jackson Laboratory	JAX: 000037	https://www.jax.org/strain/000037
Mouse: BXD151/RwwJ	The Jackson Laboratory	JAX: 029868	https://www.jax.org/strain/029868
Mouse: BXD63/RwwJ	The Jackson Laboratory	JAX: 007108	https://www.jax.org/strain/007108
Mouse: BXD24/TyRwwJ	The Jackson Laboratory	JAX: 032926	https://www.jax.org/strain/032926
Mouse: BXD144/RwwJ	The Jackson Laboratory	JAX: 025984	https://www.jax.org/strain/025984
Mouse: BXD45/RwwJ	The Jackson Laboratory	JAX: 007096	https://www.jax.org/strain/007096
Mouse: BXD73/RwwJ	The Jackson Laboratory	JAX: 007117	https://www.jax.org/strain/007117
Mouse: BXD91/2RwwJ	The Jackson Laboratory	JAX: 017751	https://www.jax.org/strain/017751
Mouse: BXD113/RwwJ	The Jackson Laboratory	JAX: 024030	https://www.jax.org/strain/024030
Mouse: BXD197/RwwJ	The Jackson Laboratory	JAX: 030880	https://www.jax.org/strain/030880
Mouse: BXD6/TyJ	The Jackson Laboratory	JAX: 000007	https://www.jax.org/strain/000007
Mouse: BXD73b/RwwJ	The Jackson Laboratory	JAX: 007146	https://www.jax.org/strain/007146
Mouse: BXD56/RwwJ	The Jackson Laboratory	JAX: 007104	https://www.jax.org/strain/007104
Mouse: BXD53/2RwwJ	The Jackson Laboratory	JAX: 017749	https://www.jax.org/strain/017749
Mouse: BXD71/RwwJ	The Jackson Laboratory	JAX: 007116	https://www.jax.org/strain/007116
Mouse: BXD184/RwwJ	The Jackson Laboratory	JAX:029884	https://www.jax.org/strain/029884
Mouse: BXD33/TyJ	The Jackson Laboratory	JAX: 003222	https://www.jax.org/strain/003222
Mouse: BXD180/RwwJ	The Jackson Laboratory	JAX: 029883	https://www.jax.org/strain/029883
Mouse: BXD84/RwwJ	The Jackson Laboratory	JAX: 007127	https://www.jax.org/strain/007127
Mouse: BXD8/TyJ	The Jackson Laboratory	JAX: 000084	https://www.jax.org/strain/000084
Mouse: BXD199/RwwJ	The Jackson Laboratory	JAX: 030881	https://www.jax.org/strain/030881
Mouse: BXD81/RwwJ	The Jackson Laboratory	JAX: 007125	https://www.jax.org/strain/007125
Mouse: BXD65/RwwJ	The Jackson Laboratory	JAX: 007110	https://www.jax.org/strain/007110
Mouse: BXD50/RwwJ	The Jackson Laboratory	JAX: 007099	https://www.jax.org/strain/007099
Mouse: BXD66/RwwJ	The Jackson Laboratory	JAX: 007111	https://www.jax.org/strain/007111
Mouse: BXD14/TyJ	The Jackson Laboratory	JAX: 000329	https://www.jax.org/strain/000329
Mouse: BXD18/TyJ	The Jackson Laboratory	JAX: 000015	https://www.jax.org/strain/000015
Mouse: BXD122/RwwJ	The Jackson Laboratory	JAX:030873	https://www.jax.org/strain/030873
Mouse: BXD156/RwwJ	The Jackson Laboratory	JAX: 029871	https://www.jax.org/strain/029871
Mouse: BXD100/RwwJ	The Jackson Laboratory	JAX: 007143	https://www.jax.org/strain/007143
Mouse: BXD169/RwwJ	The Jackson Laboratory	JAX: 029876	https://www.jax.org/strain/029876
Mouse: BXD70/RwwJ	The Jackson Laboratory	JAX: 007115	https://www.jax.org/strain/007115
Mouse: BXD38/TyJ	The Jackson Laboratory	JAX: 003227	https://www.jax.org/strain/003227
Mouse: BXD86/RwwJ	The Jackson Laboratory	JAX: 007129	https://www.jax.org/strain/007129
Mouse: BXD2/TyJ	The Jackson Laboratory	JAX: 000075	https://www.jax.org/strain/000075
Mouse: BXD62/RwwJ	The Jackson Laboratory	JAX: 007107	https://www.jax.org/strain/007107
Mouse: BXD124/RwwJ	The Jackson Laboratory	JAX: 025975	https://www.jax.org/strain/025975
Mouse: BXD27/TyJ	The Jackson Laboratory	JAX: 000041	https://www.jax.org/strain/000041
Mouse: BXD74/RwwJ	The Jackson Laboratory	JAX: 007118	https://www.jax.org/strain/007118
Mouse: BXD89/RwwJ	The Jackson Laboratory	JAX: 007132	https://www.jax.org/strain/007132
Mouse: BXD172/RwwJ	The Jackson Laboratory	JAX: 029880	https://www.jax.org/strain/029880
Mouse: BXD85/RwwJ	The Jackson Laboratory	JAX: 007128	https://www.jax.org/strain/007128
Mouse: BXD29/Ty	The Jackson Laboratory	JAX: 010981	https://www.jax.org/strain/010981
Mouse: BXD88/2RwwJ	The Jackson Laboratory	JAX: 017750	https://www.jax.org/strain/017750
Mouse: BXD98/RwwJ	The Jackson Laboratory	JAX: 007141	https://www.jax.org/strain/007141
Mouse: BXD65a/RwwJ	The Jackson Laboratory	JAX: 007140	https://www.jax.org/strain/007140
Mouse: BXD34/TyJ	The Jackson Laboratory	JAX: 003223	https://www.jax.org/strain/003223
Mouse: BXD177/RwwJ	The Jackson Laboratory	JAX: 029881	https://www.jax.org/strain/029881
Mouse: BXD150/RwwJ	The Jackson Laboratory	JAX:029867	https://www.jax.org/strain/029867
Mouse: BXD16/TyJ	The Jackson Laboratory	JAX:000013	https://www.jax.org/strain/000013
Mouse: BXD22/TyJ	The Jackson Laboratory	JAX: 000043	https://www.jax.org/strain/000043
Mouse: BXD178/RwwJ	The Jackson Laboratory	JAX: 029882	https://www.jax.org/strain/029882
Mouse: BXD161/RwwJ	The Jackson Laboratory	JAX: 025985	https://www.jax.org/strain/025985
Mouse: BXD48/RwwJ	The Jackson Laboratory	JAX: 007097	https://www.jax.org/strain/007097
Mouse: BXD55/RwwJ	The Jackson Laboratory	JAX: 007103	https://www.jax.org/strain/007103
Mouse: BXD154/RwwJ	The Jackson Laboratory	JAX: 025976	https://www.jax.org/strain/025976
Mouse: BXD40/TyJ	The Jackson Laboratory	JAX: 003229	https://www.jax.org/strain/003229
Mouse: BXD102/RwwJ	The Jackson Laboratory	JAX: 007145	https://www.jax.org/strain/007145
Mouse: BXD128/RwwJ	The Jackson Laboratory	JAX: 030874	https://www.jax.org/strain/030874
Mouse: BXD39/TyJ	The Jackson Laboratory	JAX: 003228	https://www.jax.org/strain/003228
Mouse: BXD21/TyJ	The Jackson Laboratory	JAX: 000077	https://www.jax.org/strain/000077
Mouse: BXD79/RwwJ	The Jackson Laboratory	JAX: 007123	https://www.jax.org/strain/007123
Mouse: BXD13/TyJ	The Jackson Laboratory	JAX: 000040	https://www.jax.org/strain/000040
Mouse: BXD128a/RwwJ	The Jackson Laboratory	JAX: 030875	https://www.jax.org/strain/030875
Mouse: BXD9/TyJ	The Jackson Laboratory	JAX: 000105	https://www.jax.org/strain/000105
Mouse: BXD152/RwwJ	The Jackson Laboratory	JAX: 029869	https://www.jax.org/strain/029869
Mouse: BXD87/RwwJ	The Jackson Laboratory	JAX: 007130	https://www.jax.org/strain/007130
Mouse: BXD101/RwwJ	The Jackson Laboratory	JAX: 007144	https://www.jax.org/strain/007144
